# Supplementary material for: Evaluating factors influencing the delivery and outcomes of an incentive-based behaviour change strategy targeting child obesity: protocol for a qualitative process and impact evaluation
Source: PubMed Central journal article supplement — BMJ Open. 2016 Dec 16;6(12):e012536. doi: 10.1136/bmjopen-2016-012536 (PMC5168623; doi:10.1136/bmjopen-2016-012536), 2016-12-16
Supplement: bmjopen-2016-012536supp4.pdf [file bmjopen-2016-012536supp4.pdf]

## Suppl 4. Brief survey for parents/ guardians

**Where did you attend Go4Fun?**

---

Q1. What three words come to mind when you think of your Go4Fun experience?  
(OE)

- 1.
- 2.
- 3.

Q2. Which parts of the programme did you get the most value from?  
(OE)

Q3. What were the biggest obstacles to doing the goals? Tick any that apply.  
(MR)

a. Weather

b. Cultural reasons

c. Renovation, moving house or being on holiday

d. Illness

e. Lack of motivation

f. Goals were unrealistic

g. Other

Write it here:

Q4. How would you improve the Go4Fun programme?  
(OE)

Q5. Did you receive weekly text messages from Go4Fun over the past six months?  
(SR)

a. Yes – **Go to Q6.**

b. No – **Go to Q9**

|                                                                            |  |
|----------------------------------------------------------------------------|--|
| Q6. How motivating were the rewards for doing the goals each week?<br>(SR) |  |
| a. Very motivating                                                         |  |
| b. Motivating                                                              |  |
| c. Neither motivating nor demotivating                                     |  |
| d. Demotivating                                                            |  |
| e. Very demotivating                                                       |  |

|                                                                                                                                                |  |
|------------------------------------------------------------------------------------------------------------------------------------------------|--|
| Q7. How has the goal setting and rewards component of Go4Fun helped your child or children live a healthier life? Tick any that apply.<br>(MR) |  |
| a. As a family we have a healthier attitude towards food                                                                                       |  |
| b. As a family we eat more fruit and vegetables                                                                                                |  |
| c. I personally have a healthier attitude towards food                                                                                         |  |
| d. My child or children are more active now                                                                                                    |  |
| e. I haven't noticed a change in my child's behaviour                                                                                          |  |
| f. I haven't noticed a change in my family's behaviour                                                                                         |  |

|                                                                                                                                                                                                                           |  |
|---------------------------------------------------------------------------------------------------------------------------------------------------------------------------------------------------------------------------|--|
| Q8. Would you be happy to participate in a family interview or focus group about Go4Fun?<br>Tick one or both if you'd like and if you provide your contact details Gemma Enright will contact you soon to arrange a time. |  |
| a. I'd like to participate in a <b>family interview</b>                                                                                                                                                                   |  |
| b. I'd like to participate in a <b>focus group</b>                                                                                                                                                                        |  |
| My contact details are:<br><br>Name: _____<br><br>Email: _____<br><br>Phone: _____                                                                                                                                        |  |
| c. No thank you.                                                                                                                                                                                                          |  |

|                                                                                                  |
|--------------------------------------------------------------------------------------------------|
| Q9. Any other comments?<br>Feel free to tell us any other thoughts you have about the programme! |
|                                                                                                  |

Thank you so much for taking the time to complete the survey!
